# Supplementary material
Source: publisher figshare collection journal article supplement (https://tandf.figshare.com/ndownloader/files/16586924)
Supplement: Supplementary file 1 [file 16586924]

Supporting material

# Calculations

Calculation of vitamin B6 concentration in 1 g W1/O/W2 emulsions when 1.5 wt% vitamin B6 was added to W1 of E1：

(S1)

Calculation of encapsulation efﬁciencies by centrifugation measurement:

Assume that the internal and external water phase osmotic pressure balance, the external water phase quality is equal to the initial addition amount. After centrifugation, 0.34 g of supernatant were determined by CV measurement.

(S2)

(S3)

(S4)

Table S1 Current values and the concentrations of vitamin B6 (n=3)

| Electrolyte | Regression equations | Day 0 | | |  | Day 14 | |
| --- | --- | --- | --- | --- | --- | --- | --- |
| Current  /(μA) | | Concentration  /(mmol/L) | Current  /(μA) | Concentration  /(mmol/L) |
| PBS-ME | *y*= 40.8 *x*－1.4* | | 1.33  ± 0.13 | 0.067  ± 0.003 |  | 4.38  ± 0.09 | 0.142  ± 0.002 |
| PBS-ME-EtOH | *y* = 52.9 *x* + 0.7 | 27.45  ± 0.24 | | 0.506  ± 0.005 | 27.46  ± 0.32 | 0.510  ± 0.003 |
| Original Concentration/(mmol/L) | | 0.51 | | | | | |
| EE/(%) | | 86.9 ± 0.59 | | | 72.2 ± 0.43 | | |

* *y* represents for peak currents i/(μA), and *x* represents for the concentration of vitamin B6 *c*/(mmol/L)

Table S2 Current values and the concentrations of vitamin B6 (n=3).

| Electrolyte | Regression equations | Day 0 | |  | | Day 14 | |
| --- | --- | --- | --- | --- | --- | --- | --- |
| Current/(μA) | Concentration  /(mmol/L) |  | | Current/(μA) | Concentration/ (mmol/L) |
| PBS | *y= 68.7 x+2.2** | 5.31  ± 0.07 | 0.045  ± 0.001 |  | | 7.41  ± 0.34 | 0.045  ± 0.001 |
| *c*2 | | 0.086 ± 0.002 | | | 0.15 ± 0.01 | | |
| Original concentration /(mmol/L) | | 0.51 | | | | | |
| EE/(%) | | 88.2 ± 0.20 | | | 71.5 ± 0.78 | | |

* *y* represents for peak currents i/(μA), and *x* represents for the concentration of vitamin B6 *c*/(mmol/L)

Fig.S1 The voltammograms of vitamin B6 in W2 of the W1/O/W2 emulsions at beginning of the formation (a) and after 14 days under room temperature (b) by direct determination. 0.05 mmol/L phosphate buffer solution (PBS), pH 6.0, scan rate of 100 mV/s.

Fig.S2 The voltammograms of vitamin B6 in W2 of the W1/O/W2 emulsions on formation (a) and after 14 days under room temperature (b) by centrifugation method. 0.05mmol/L phosphate buffer solution (PBS), pH 6.0, scan rate of 100 mV/s.
